# Supplementary material for: UHPLC-QQQ-MS and RP-HPLC Detection of Bioactive Alizarin and Scopoletin Metabolites from Morinda citrifolia Root Extracts and Their Antitubercular, Antibacterial, and Antioxidant Activities
Source: PubMed Central journal article supplement — ACS Omega. 2023 Aug 1;8(32):29615–24. doi: 10.1021/acsomega.3c03656 (PMC10433487; doi:10.1021/acsomega.3c03656), 2023-08-01

## Supplementary Information

### **UHPLC-QQQ-MS and RP-HPLC detection of bioactive alizarin and scopoletin metabolites from *Morinda citrifolia* root extracts and their antitubercular, antibacterial, and antioxidant activities**

Pornpat Sam-ang<sup>a,†</sup>, Anuchit Phanumartwiwath<sup>b,†,\*</sup>, Desy Liana<sup>b</sup>, Sanya Sureram<sup>c</sup>, Poonpilas Hongmanee<sup>d</sup> and Prasat Kittakoop<sup>e</sup>

<sup>a</sup>*Department of Chemistry, Faculty of Science and Technology, Pibulsongkram Rajabhat University, Phitsanulok 65000, Thailand.*

<sup>b</sup>*College of Public Health Sciences, Chulalongkorn University, Bangkok 10330, Thailand.*

<sup>c</sup>*Chulabhorn Research Institute, Bangkok 10210, Thailand.*

<sup>d</sup>*Department of Pathology, Faculty of Medicine, Ramathibodi Hospital, Mahidol University, Bangkok 10400, Thailand.*

<sup>e</sup>*Chulabhorn Graduate Institute, Chemical Sciences Program, Bangkok 10210, Thailand.*

†These authors contributed equally to this work.

\*Corresponding author: Dr. Anuchit Phanumartwiwath, College of Public Health Sciences, Chulalongkorn University, Bangkok 10330, Thailand. E-mail: [anuchit.p@chula.ac.th](mailto:anuchit.p@chula.ac.th)

## 2,2-Diphenyl-1-picrylhydrazyl (DPPH) Radical Scavenging Activity of Quercetin

**Table S1.** Scavenging activity (% inhibition) of quercetin against DPPH radical (N=3).

| Concentration<br>( $\mu\text{g/mL}$ ) | Quercetin      |      |   |
|---------------------------------------|----------------|------|---|
|                                       | Inhibition (%) | SD   | N |
| 100                                   | 89.05          | 0.62 | 3 |
| 50                                    | 89.43          | 0.68 | 3 |
| 25                                    | 81.72          | 4.82 | 3 |
| 12.5                                  | 41.91          | 0.52 | 3 |
| 6.25                                  | 20.25          | 0.22 | 3 |
| 0                                     | 0              | 0    | 3 |

**Figure S1.** Inhibition curve of quercetin against DPPH radical (N=3).

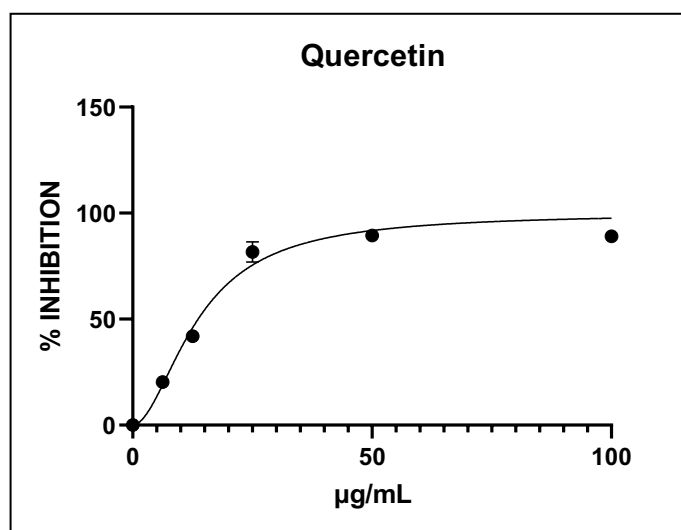

## DPPH Radical Scavenging Activity of *Morinda citrifolia* Root Extracts

**Table S2.** Scavenging activity (% inhibition) of *M. citrifolia* root extracts against DPPH radical (N=3).

| Concentration<br>(mg/mL) | Hexane   |      |   | Dichloromethane |      |   | Ethyl acetate |      |   | Ethanol  |      |   |
|--------------------------|----------|------|---|-----------------|------|---|---------------|------|---|----------|------|---|
|                          | %<br>INH | SD   | N | %<br>INH        | SD   | N | %<br>INH      | SD   | N | %<br>INH | SD   | N |
| 5                        | 57.89    | 1.51 | 3 | 77.54           | 3.20 | 3 | 62.82         | 2.96 | 3 | -        | -    | - |
| 2.5                      | 42.98    | 2.51 | 3 | 64.56           | 2.61 | 3 | 48.34         | 2.18 | 3 | 70.32    | 1.17 | 3 |
| 1.25                     | 35.54    | 5.42 | 3 | 51.17           | 0.95 | 3 | 36.26         | 1.14 | 3 | 55.46    | 0.65 | 3 |
| 0.625                    | 23.08    | 1.17 | 3 | 41.13           | 0.56 | 3 | 29.00         | 0.34 | 3 | 44.19    | 0.99 | 3 |
| 0.3125                   | 19.93    | 0.57 | 3 | 33.69           | 1.90 | 3 | 21.39         | 1.00 | 3 | 35.04    | 1.62 | 3 |
| 0                        | 0        | 0    | 3 | 0               | 0    | 3 | 0             | 0    | 3 | 0        | 0    | 3 |

INH = Inhibition.

**Figure S2.** Inhibition curve of *M. citrifolia* roots extracts against DPPH radical (N=3).

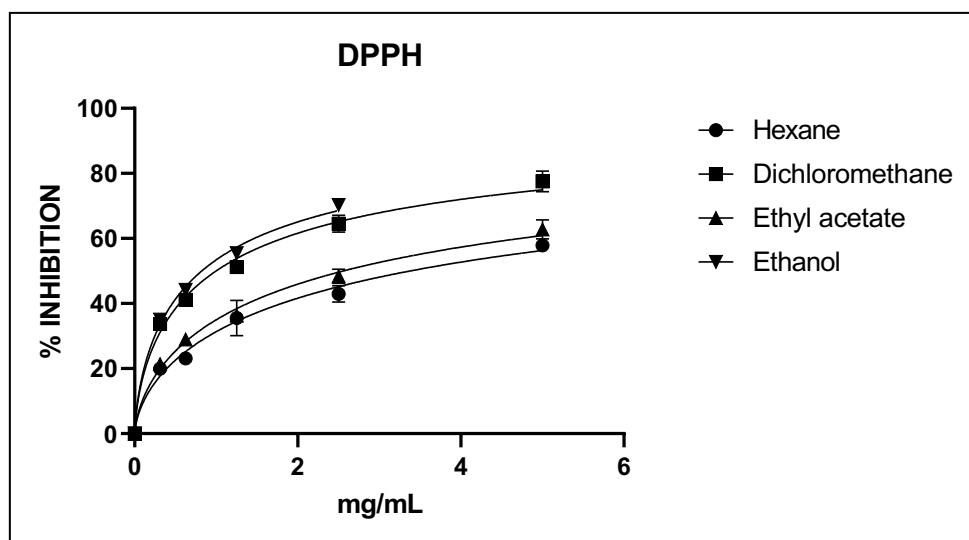

## Nitric Oxide (NO) Radical Scavenging Activity of Gallic acid

**Table S3.** Scavenging activity (% inhibition) of gallic acid against NO radical (N=3).

| Concentration<br>( $\mu\text{g/mL}$ ) | Inhibition (%) | Gallic acid<br>SD | N |
|---------------------------------------|----------------|-------------------|---|
| 1000                                  | 74.88          | 2.39              | 3 |
| 500                                   | 72.76          | 1.67              | 3 |
| 250                                   | 70.34          | 1.12              | 3 |
| 125                                   | 66.33          | 0.77              | 3 |
| 62.5                                  | 47.77          | 0.46              | 3 |
| 0                                     | 0              | 0                 | 3 |

**Figure S3.** Inhibition curve of gallic acid against NO radical (N=3).

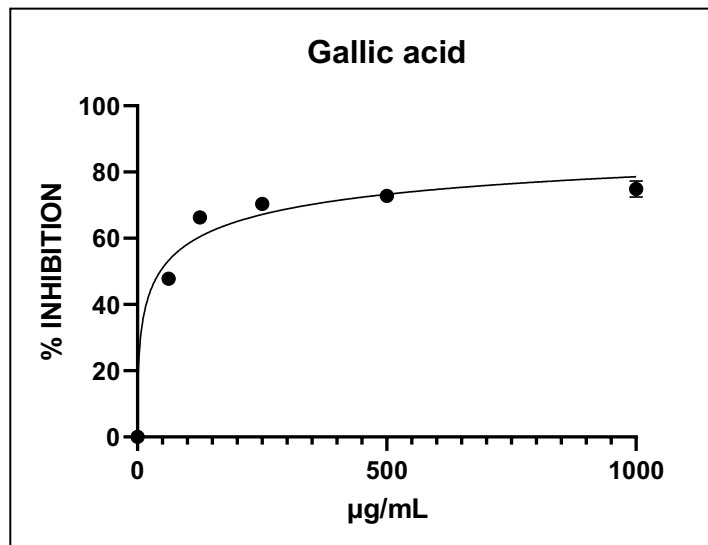

## NO Radical Scavenging Activity of *M. citrifolia* Root Extracts

**Table S4.** Scavenging activity (% inhibition) of *M. citrifolia* roots extracts against NO radical (N=3).

| Concentration<br>(mg/mL) | Hexane   |      |   | Dichloromethane |      |   | Ethyl acetate |      |   | Ethanol  |      |   |
|--------------------------|----------|------|---|-----------------|------|---|---------------|------|---|----------|------|---|
|                          | %<br>INH | SD   | N | %<br>INH        | SD   | N | %<br>INH      | SD   | N | %<br>INH | SD   | N |
| 5                        | 64.85    | 2.16 | 3 | 68.61           | 6.62 | 3 | 68.06         | 2.63 | 3 | -        | -    | - |
| 2.5                      | 60.79    | 6.61 | 3 | 72.64           | 4.40 | 3 | 57.74         | 1.64 | 3 | 78.15    | 6.59 | 3 |
| 1.25                     | 42.30    | 3.82 | 3 | 63.61           | 2.81 | 3 | 41.02         | 2.52 | 3 | 65.45    | 5.65 | 3 |
| 0.625                    | 27.61    | 2.10 | 3 | 47.75           | 1.19 | 3 | 29.84         | 1.05 | 3 | 46.69    | 2.80 | 3 |
| 0.3125                   | 21.55    | 6.32 | 3 | 38.41           | 0.99 | 3 | 16.23         | 3.26 | 3 | 25.24    | 3.17 | 3 |
| 0                        | 0        | 0    | 3 | 0               | 0    | 3 | 0             | 0    | 3 | 0        | 0    | 3 |

INH = Inhibition.

**Figure S4.** Inhibition curve of *M. citrifolia* root extracts against NO radical (N=3).

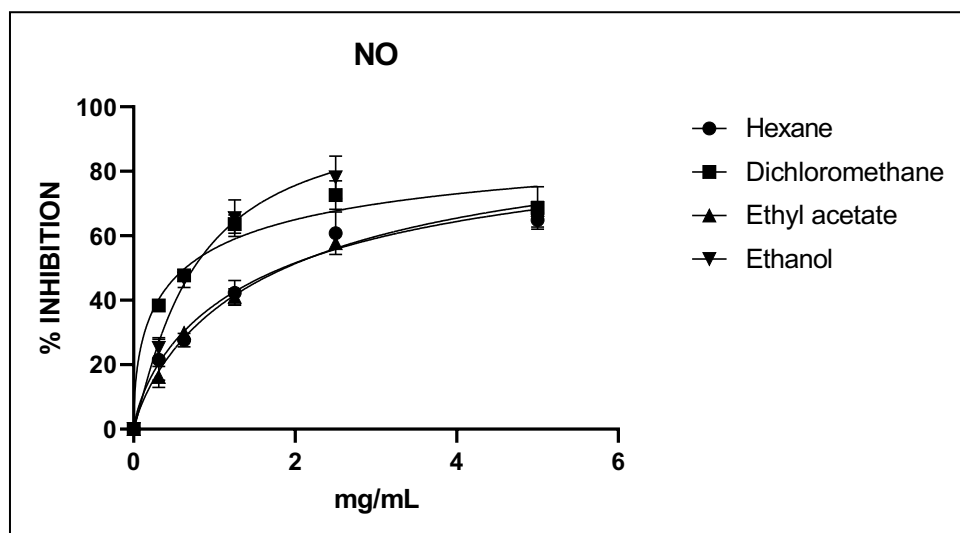

## Ferric Reducing Ability Power (FRAP) of *M. citrifolia* Root Extracts

**Table S5.** FRAP assay of *M. citrifolia* root extracts.

| Extracts        | FRAP value (mM FeSO <sub>4</sub> /g extract) |      |      |                          |
|-----------------|----------------------------------------------|------|------|--------------------------|
|                 | 1                                            | 2    | 3    | Mean ± SD                |
| Hexane          | 2.71                                         | 2.16 | 2.17 | 2.35 ± 0.31 <sup>a</sup> |
| Dichloromethane | 3.90                                         | 4.28 | 3.74 | 3.97 ± 0.28 <sup>b</sup> |
| Ethyl acetate   | 3.91                                         | 4.06 | 3.79 | 3.92 ± 0.14 <sup>b</sup> |
| Ethanol         | 5.10                                         | 5.05 | 4.92 | 5.02 ± 0.09 <sup>c</sup> |

**Figure S5.** Standard calibration curve of ferrous sulfate (FeSO<sub>4</sub>).

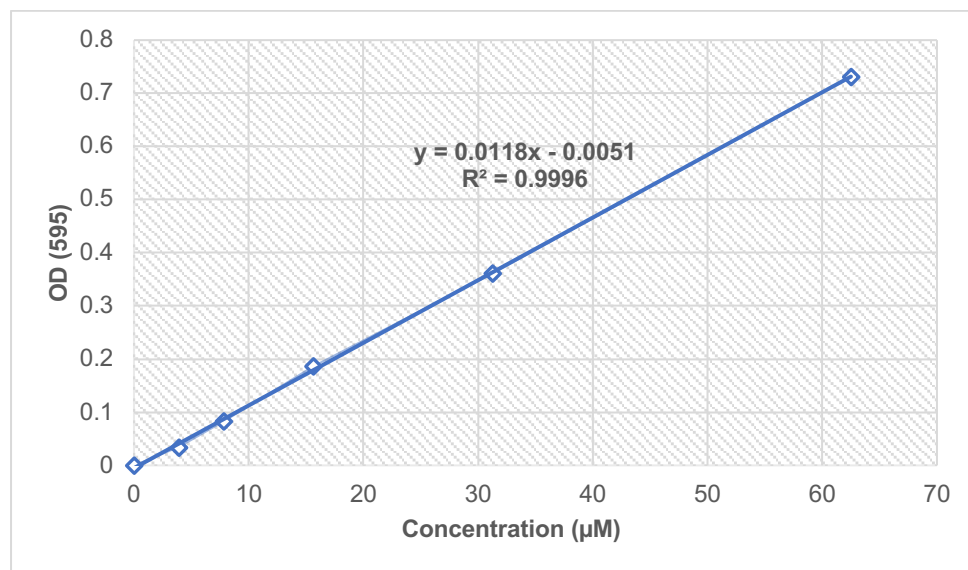

## Quantification of Alizarin and Scopoletin by Reverse-Phase High-Performance Liquid Chromatography (RP- HPLC)

**Figure S6.** RP-HPLC standard curves of alizarin ( $\lambda=250$  nm) and scopoletin ( $\lambda=350$  nm).

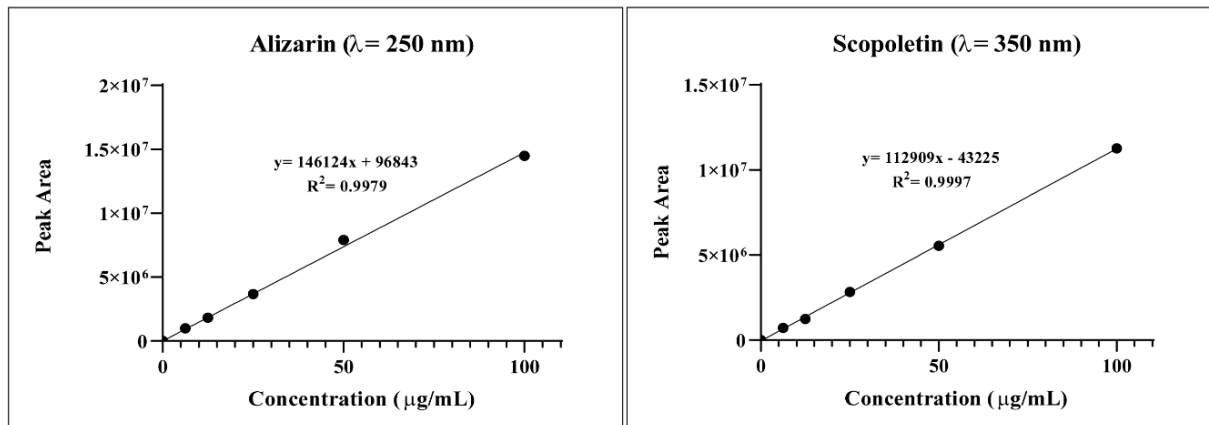

**Figure S7.**  $^1\text{H-NMR}$  (300 MHz, in  $\text{CDCl}_3$ ) spectrum of hexane *M. citrifolia* root extract.

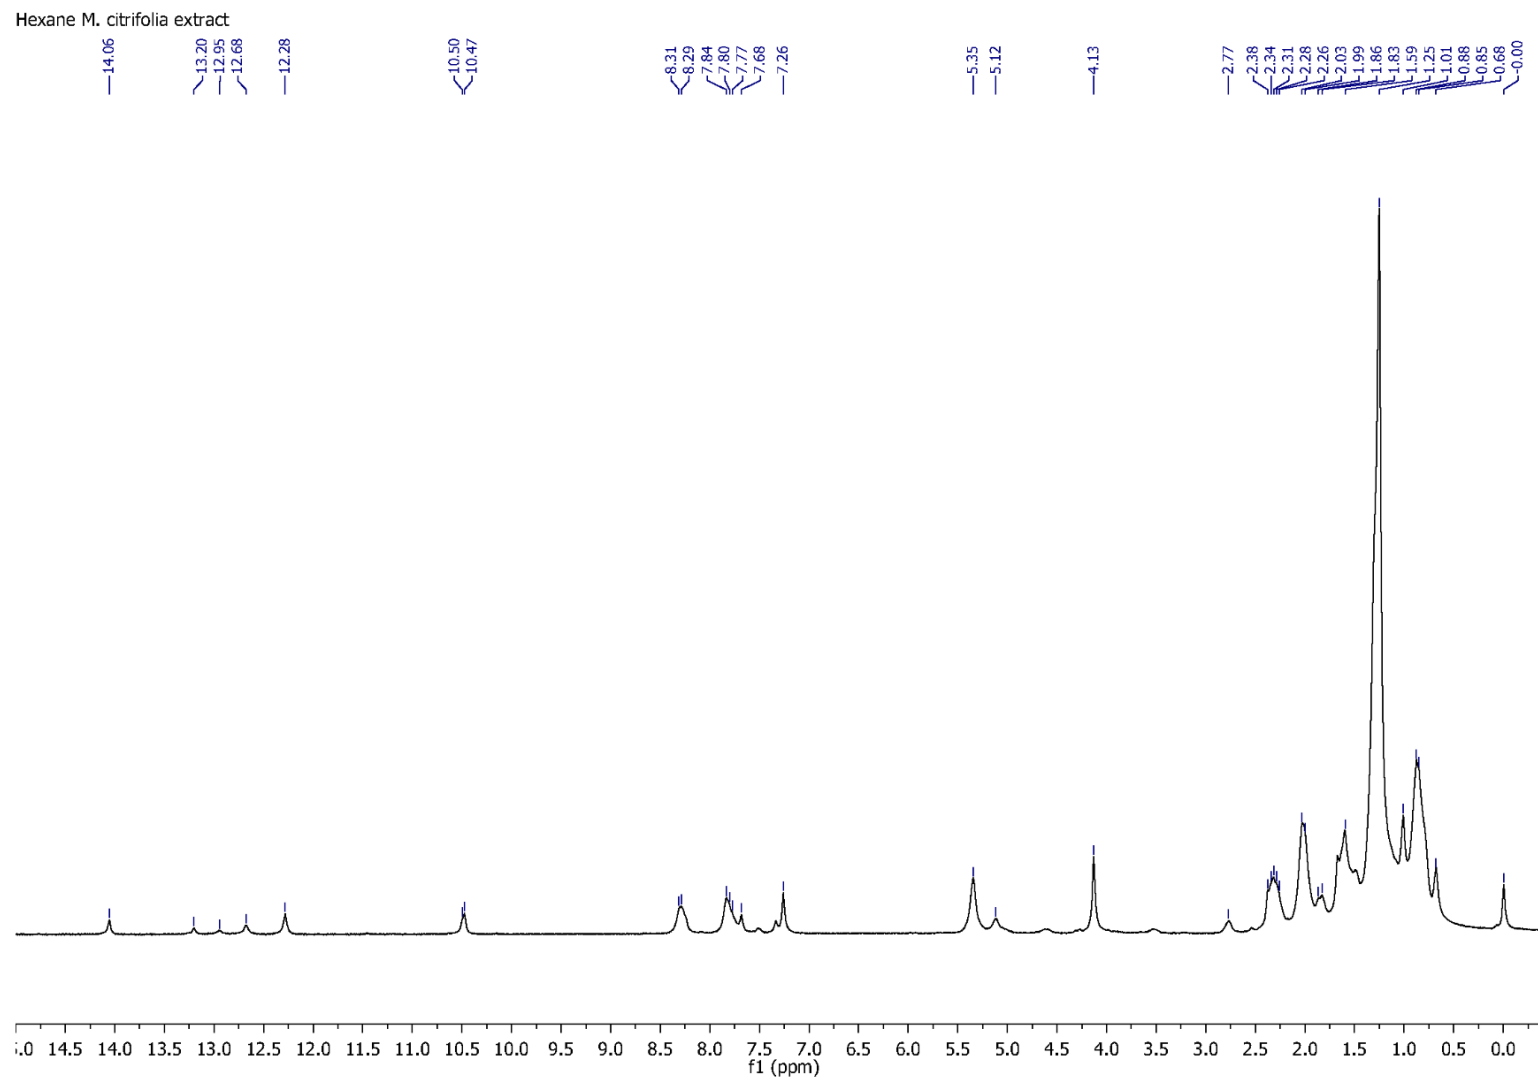



**Figure S8.**  $^1\text{H-NMR}$  (300 MHz, in  $\text{CDCl}_3$ ) spectrum of dichloromethane *M. citrifolia* root extract.

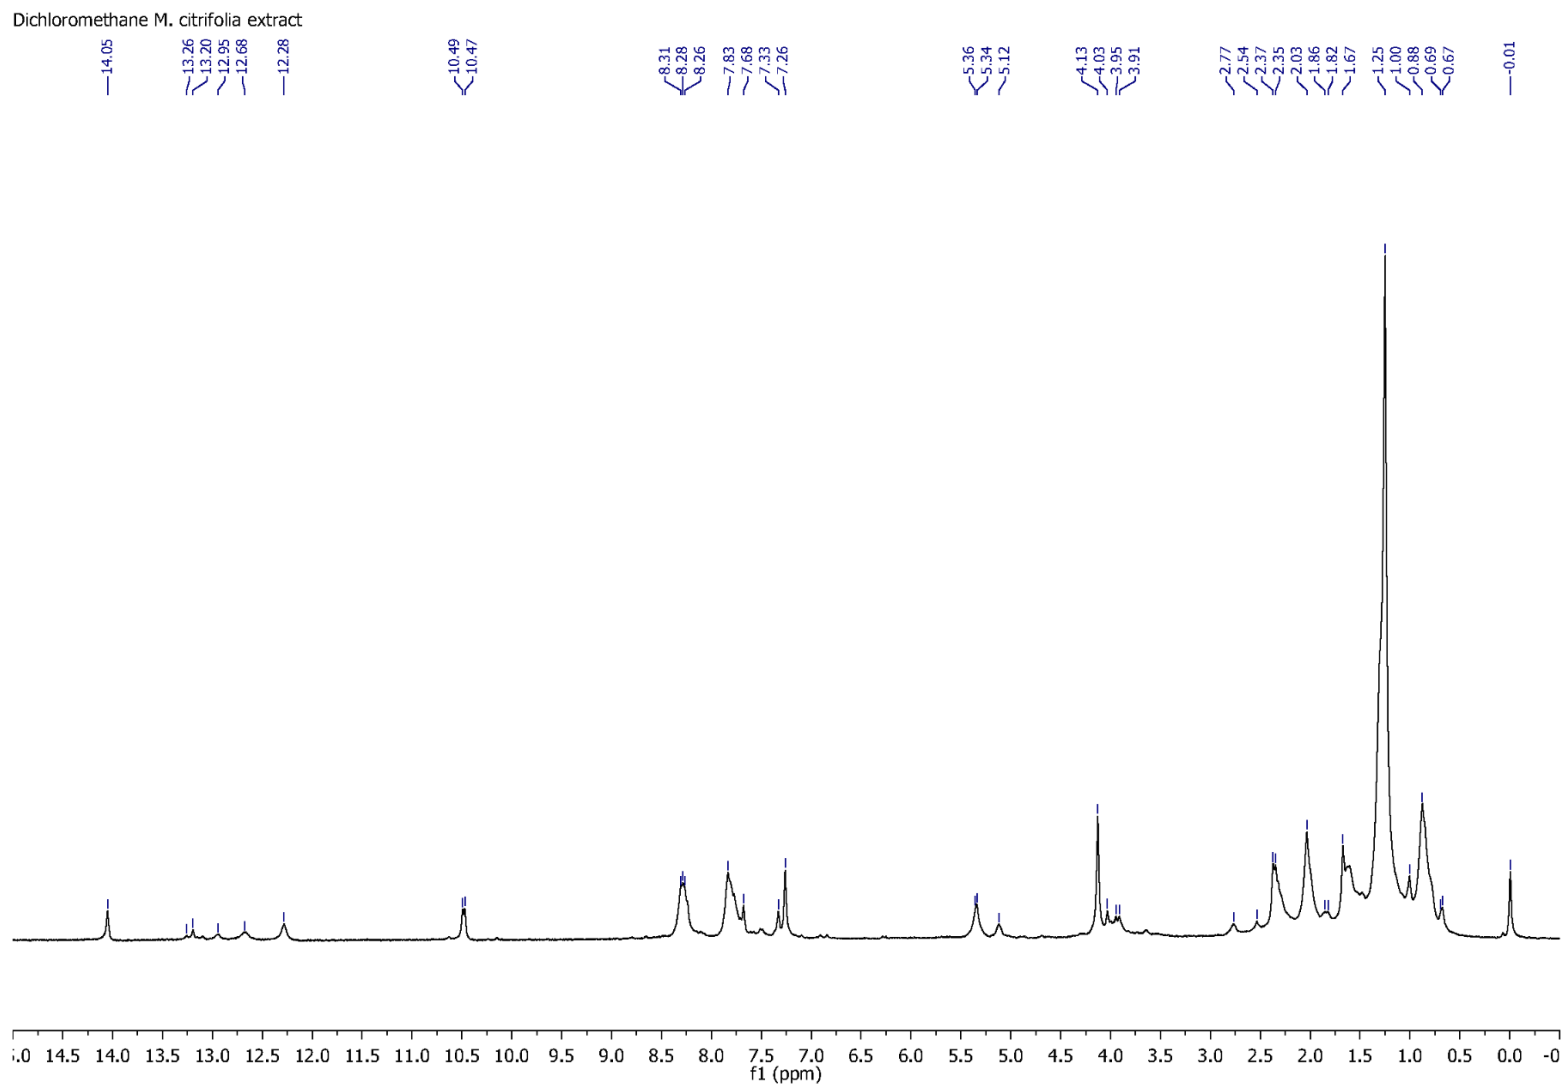

**Figure S9.**  $^1\text{H-NMR}$  (300 MHz, in acetone- $\text{d}_6$ ) spectrum of ethyl acetate *M. citrifolia* root extract.

Ethyl acetate *M. citrifolia* extract

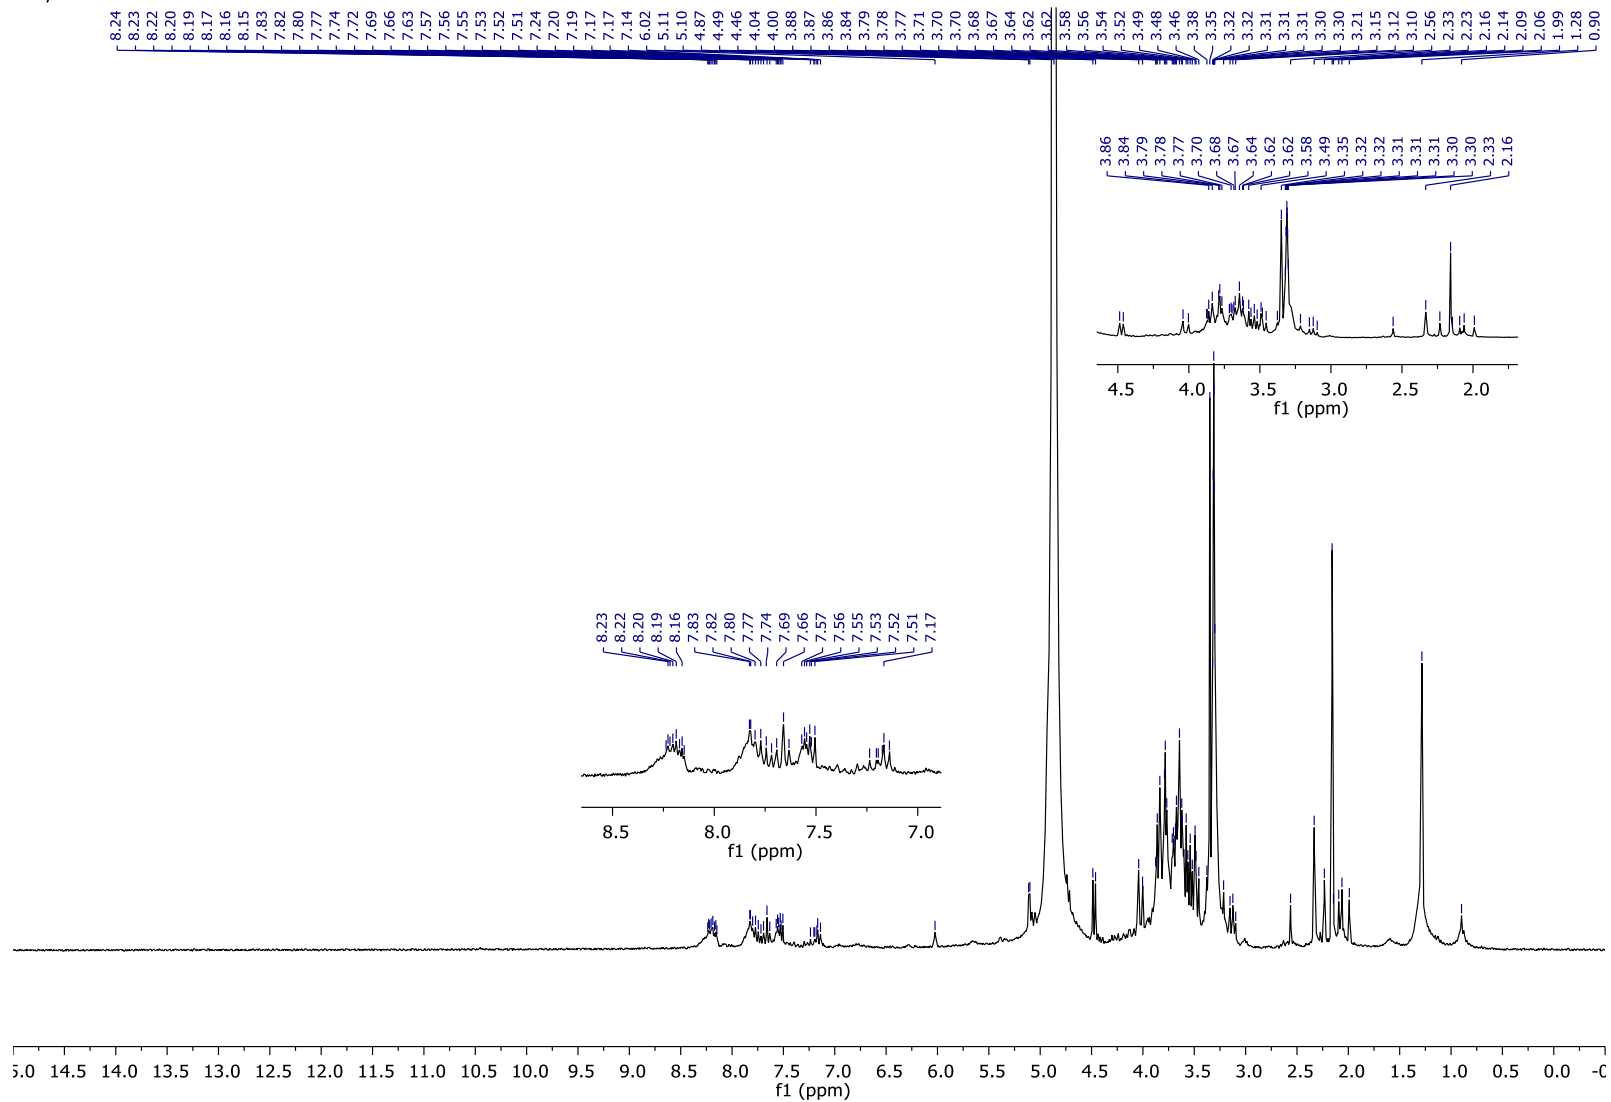

**Figure S10.**  $^1\text{H-NMR}$  (300 MHz, in  $\text{CD}_3\text{OD}$ ) spectrum of ethanol *M. citrifolia* root extract.

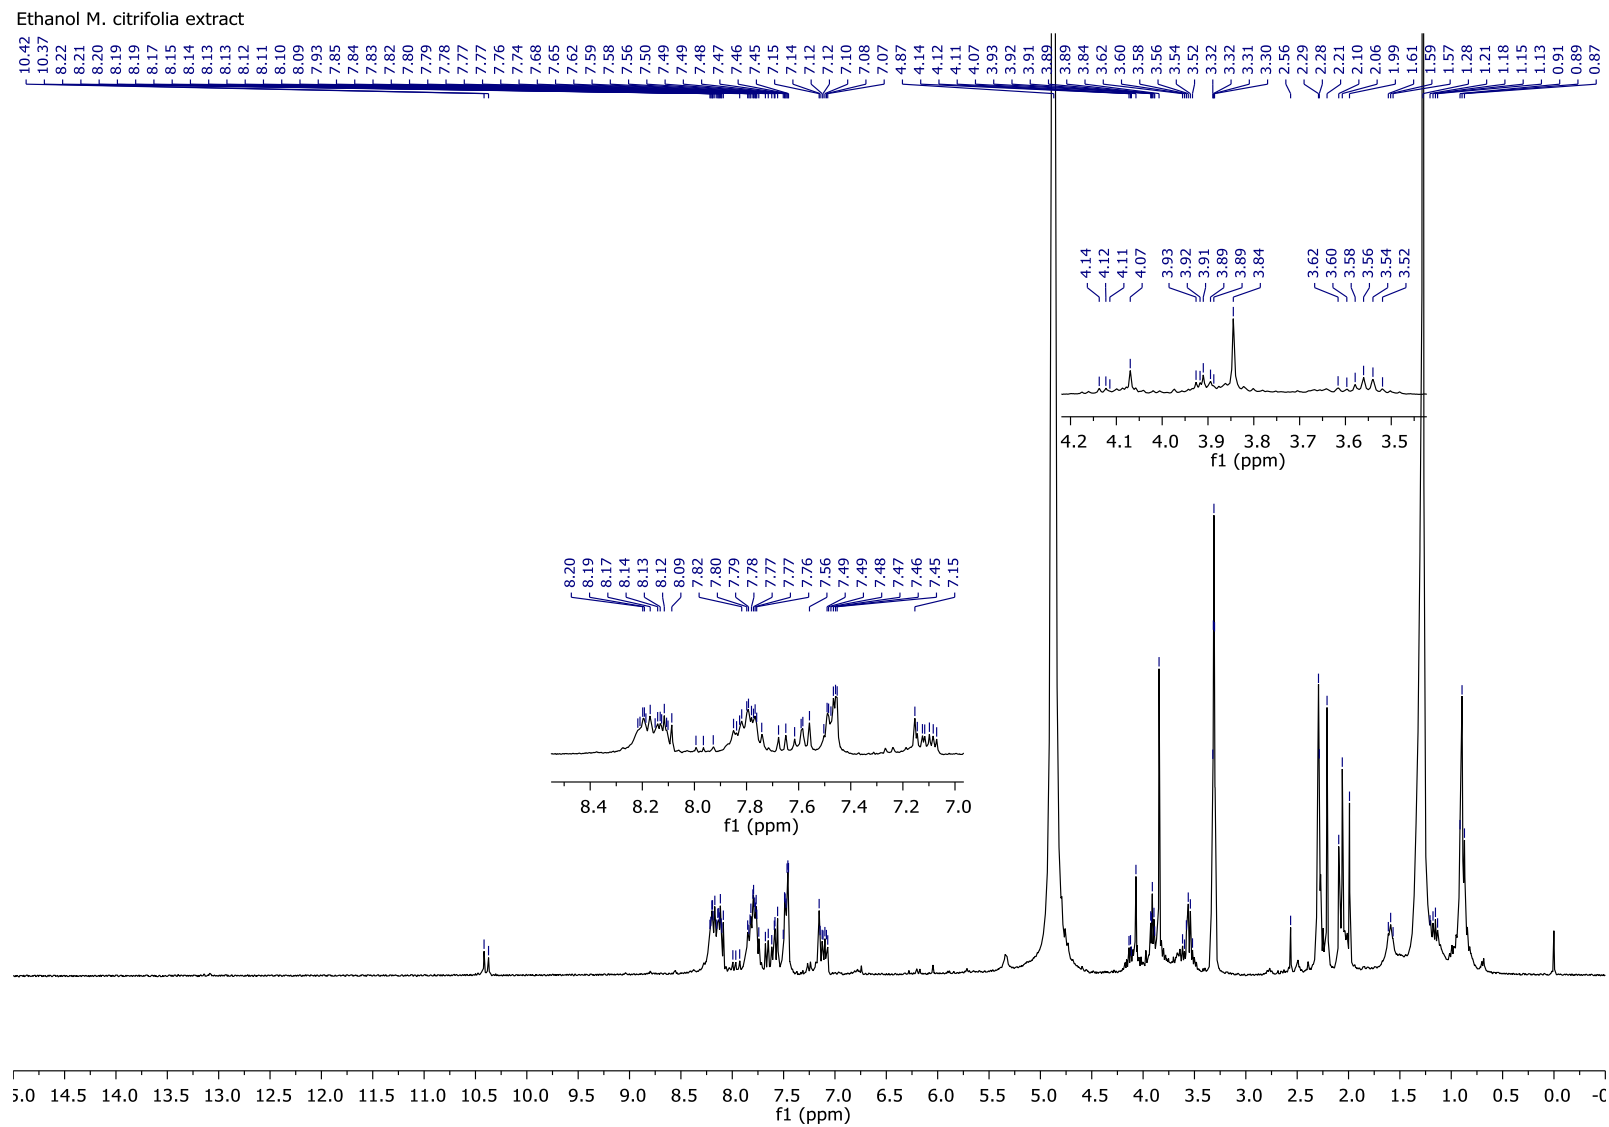

**Figure S11.** UHPLC-QQQ-MS chromatogram of alizarin in the dichloromethane *M. citrifolia* root extract.

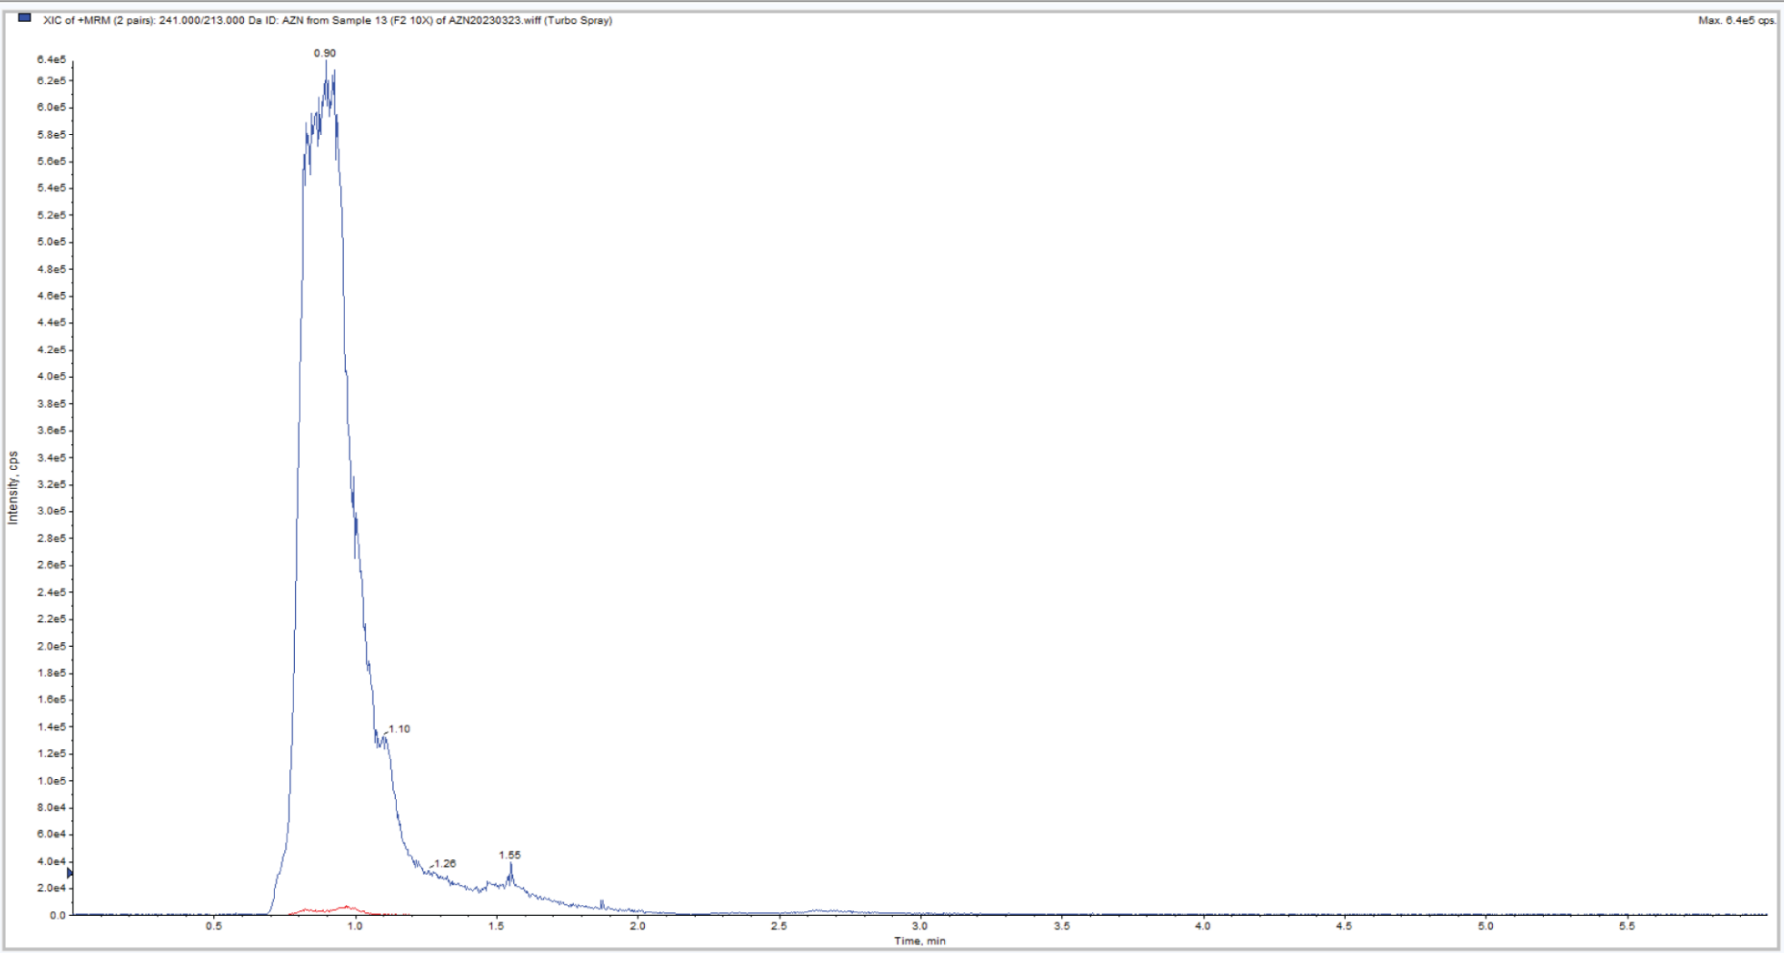

**Figure S12.** UHPLC-QQQ-MS chromatogram of alizarin in the ethyl acetate *M. citrifolia* root extract.

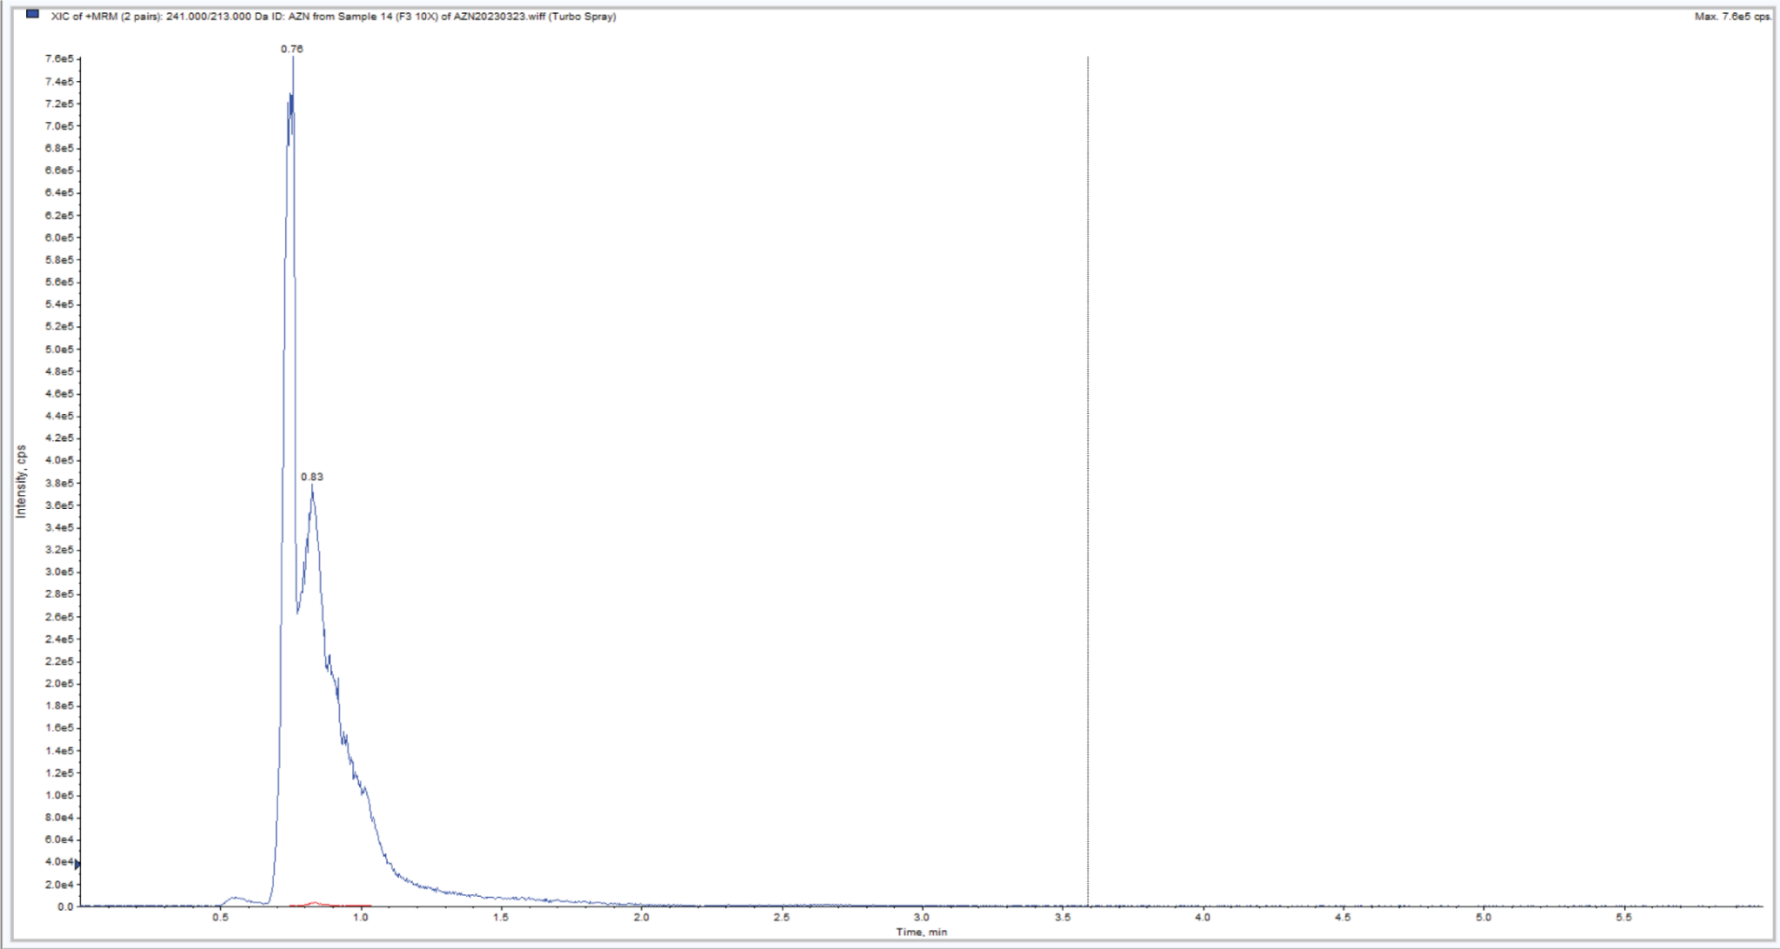

**Figure S13.** UHPLC-QQQ-MS chromatogram of alizarin in the ethanol *M. citrifolia* root extract.

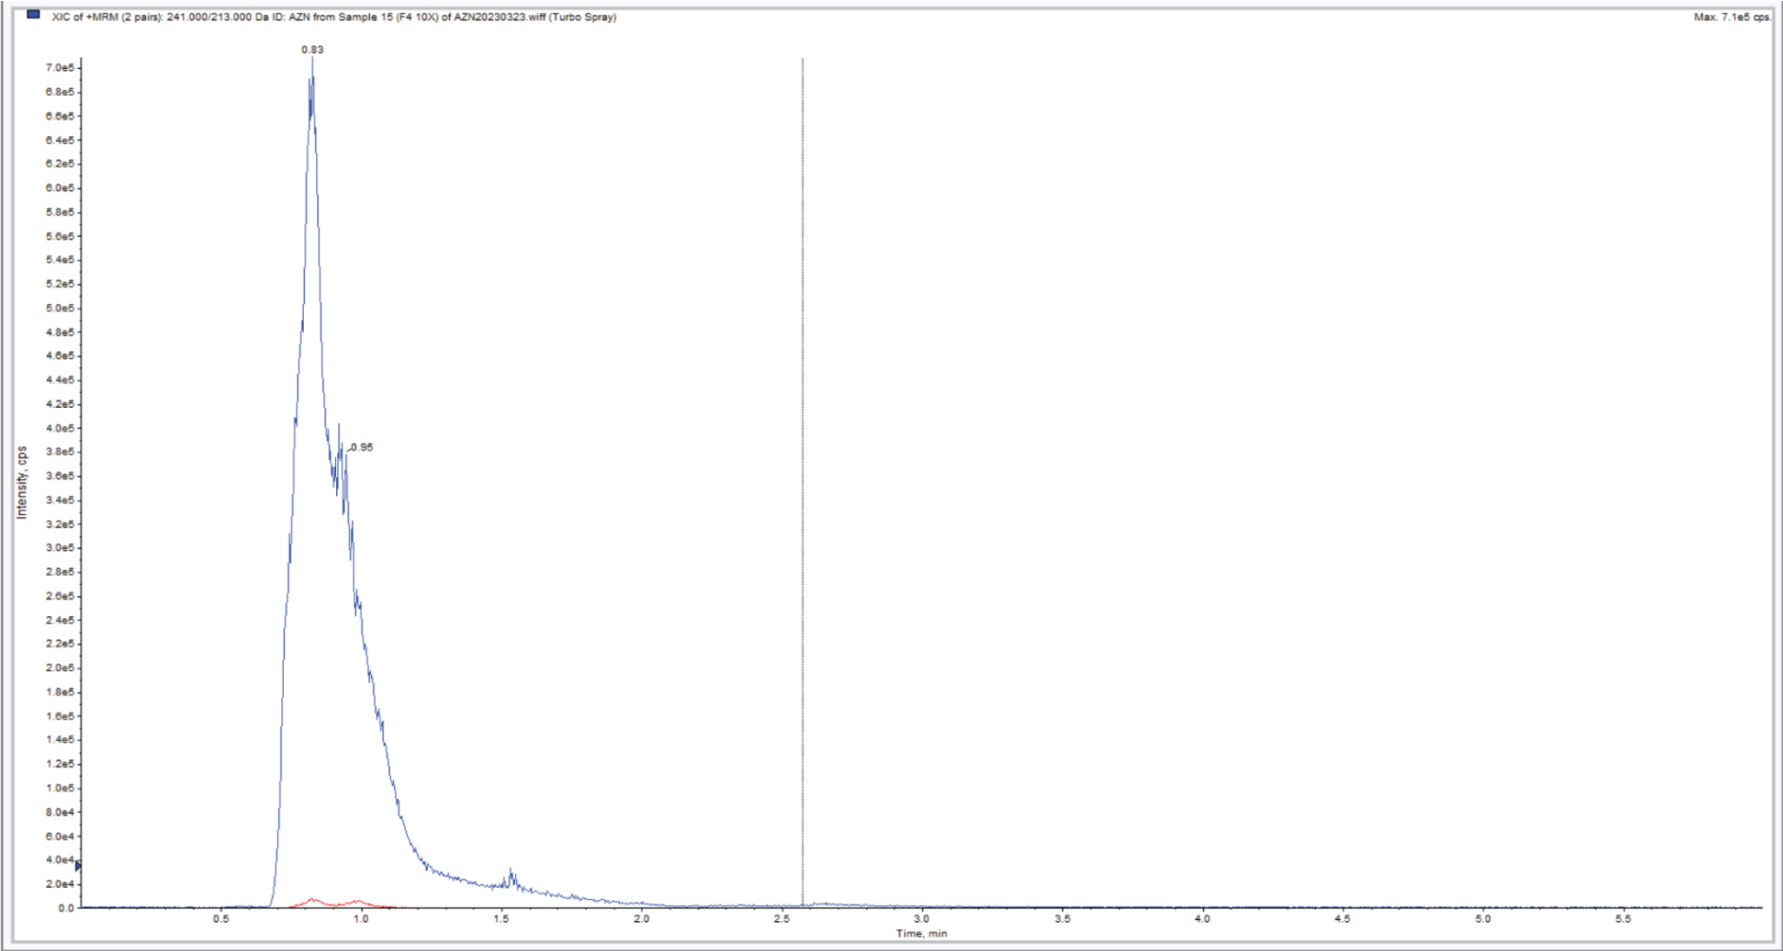

**Figure S14.** UHPLC-QQQ-MS chromatogram of scopoletin in the dichloromethane *M. citrifolia* root extract.

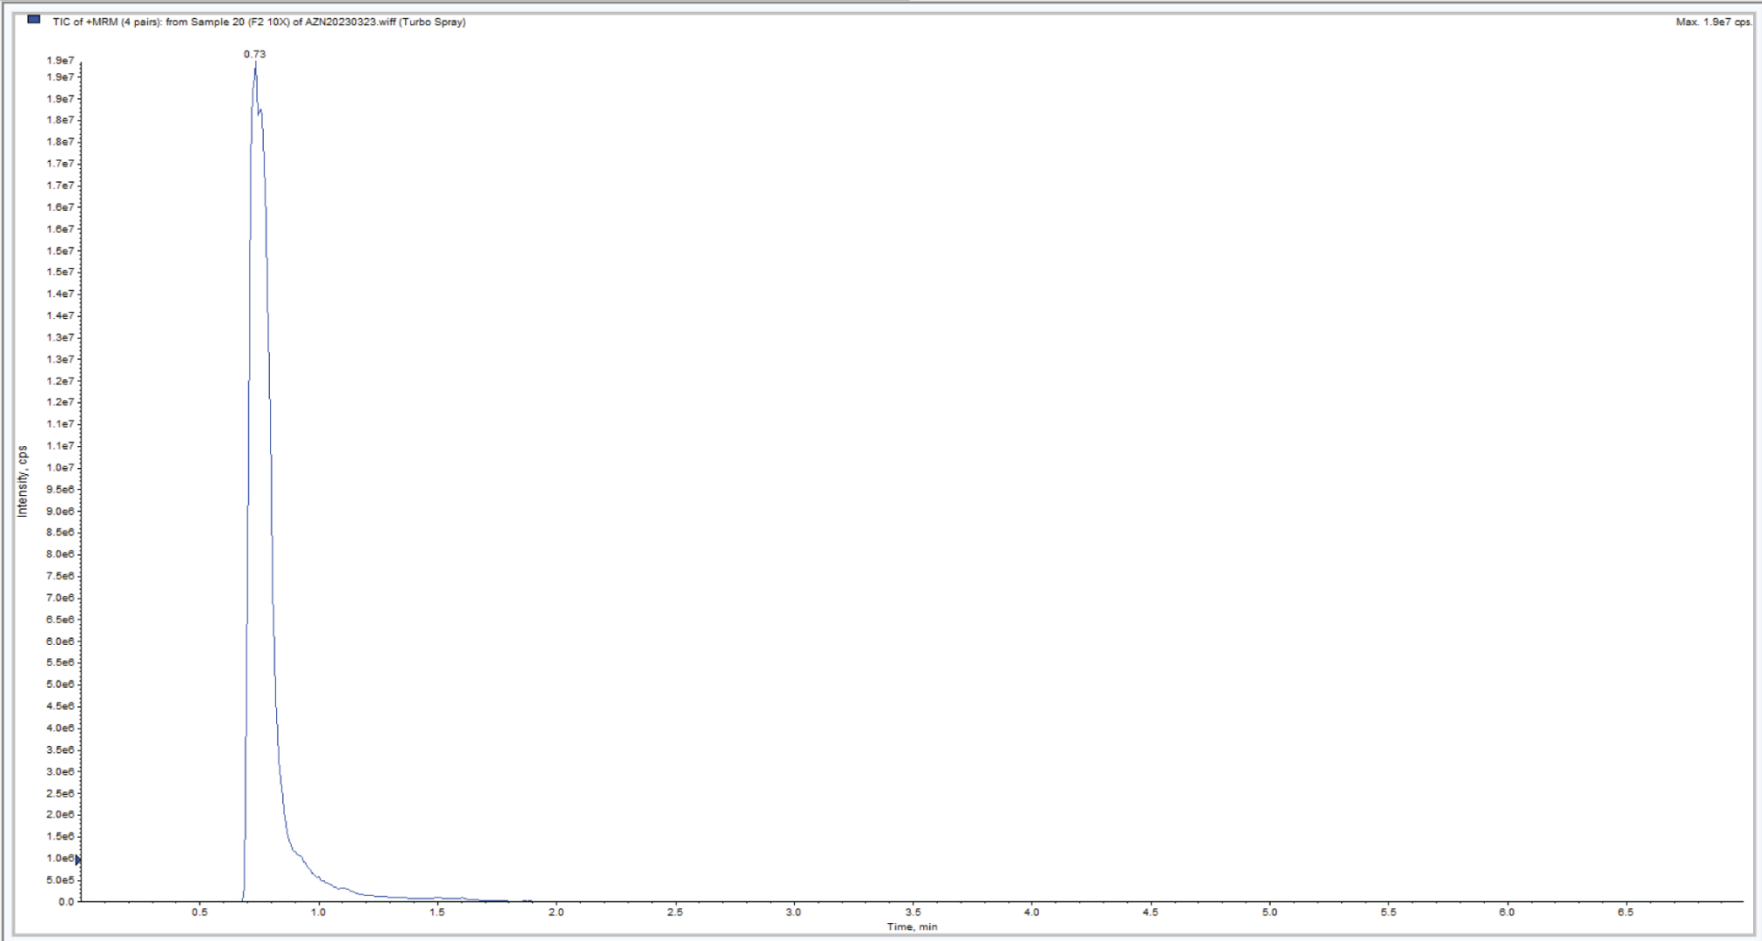

**Figure S15.** UHPLC-QQQ-MS chromatogram of scopoletin in the ethyl acetate *M. citrifolia* root extract.

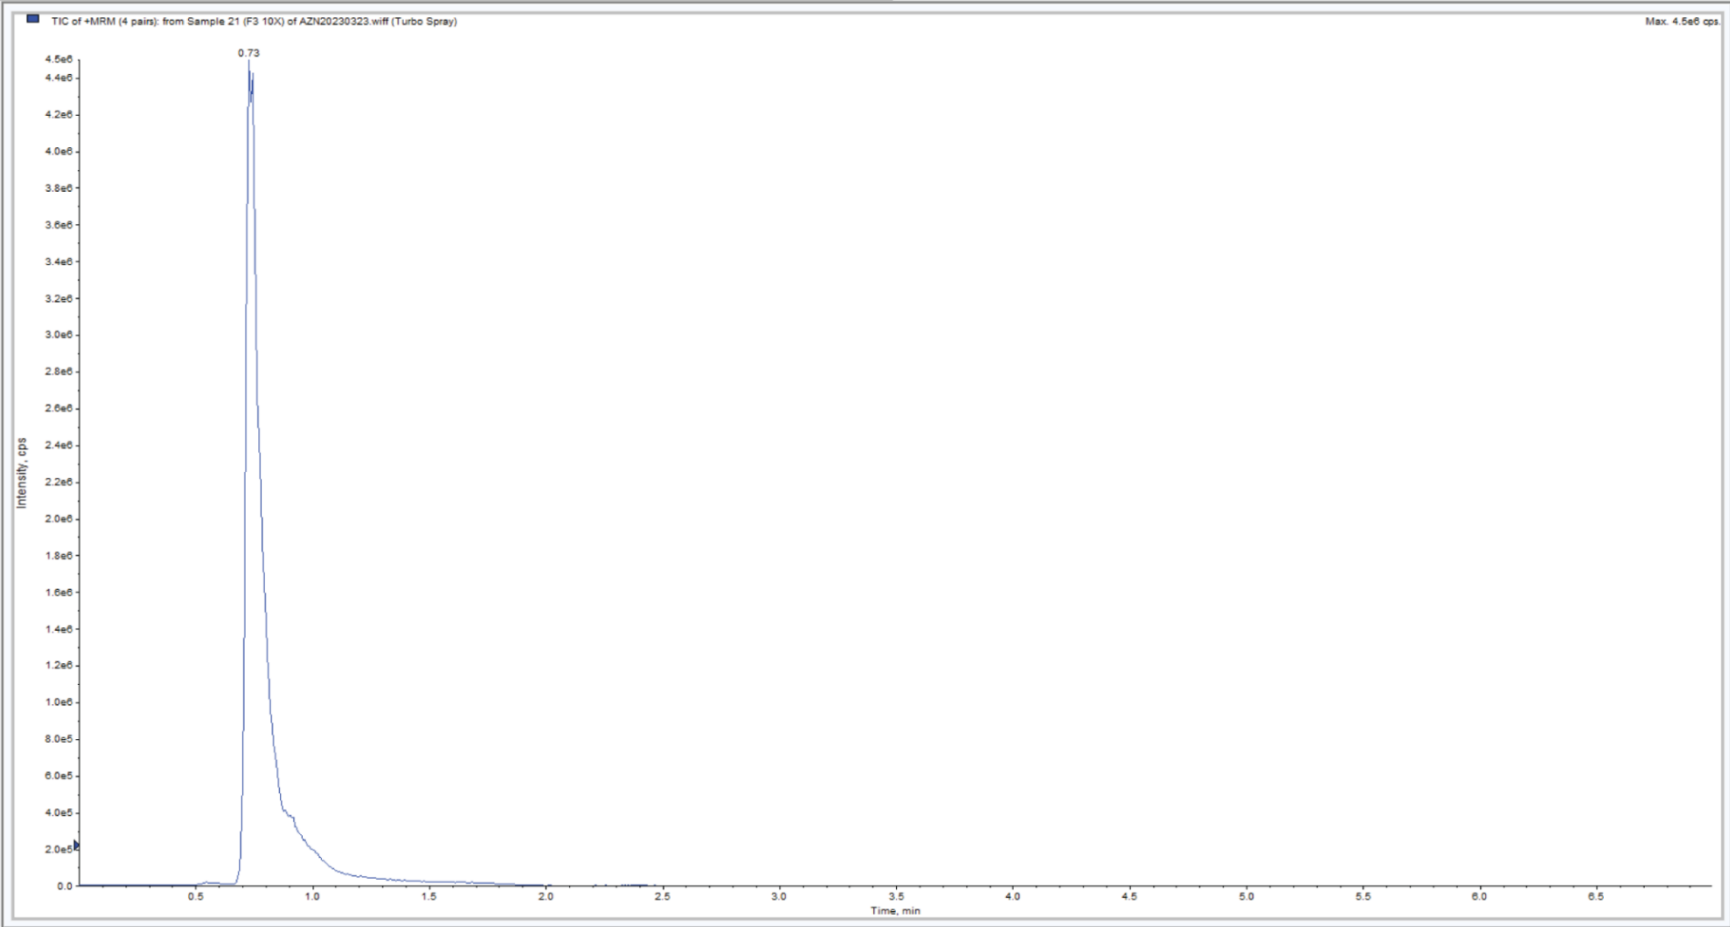



**Figure S16.** UHPLC-QQQ-MS chromatogram of scopoletin in the ethanol *M. citrifolia* root extract.

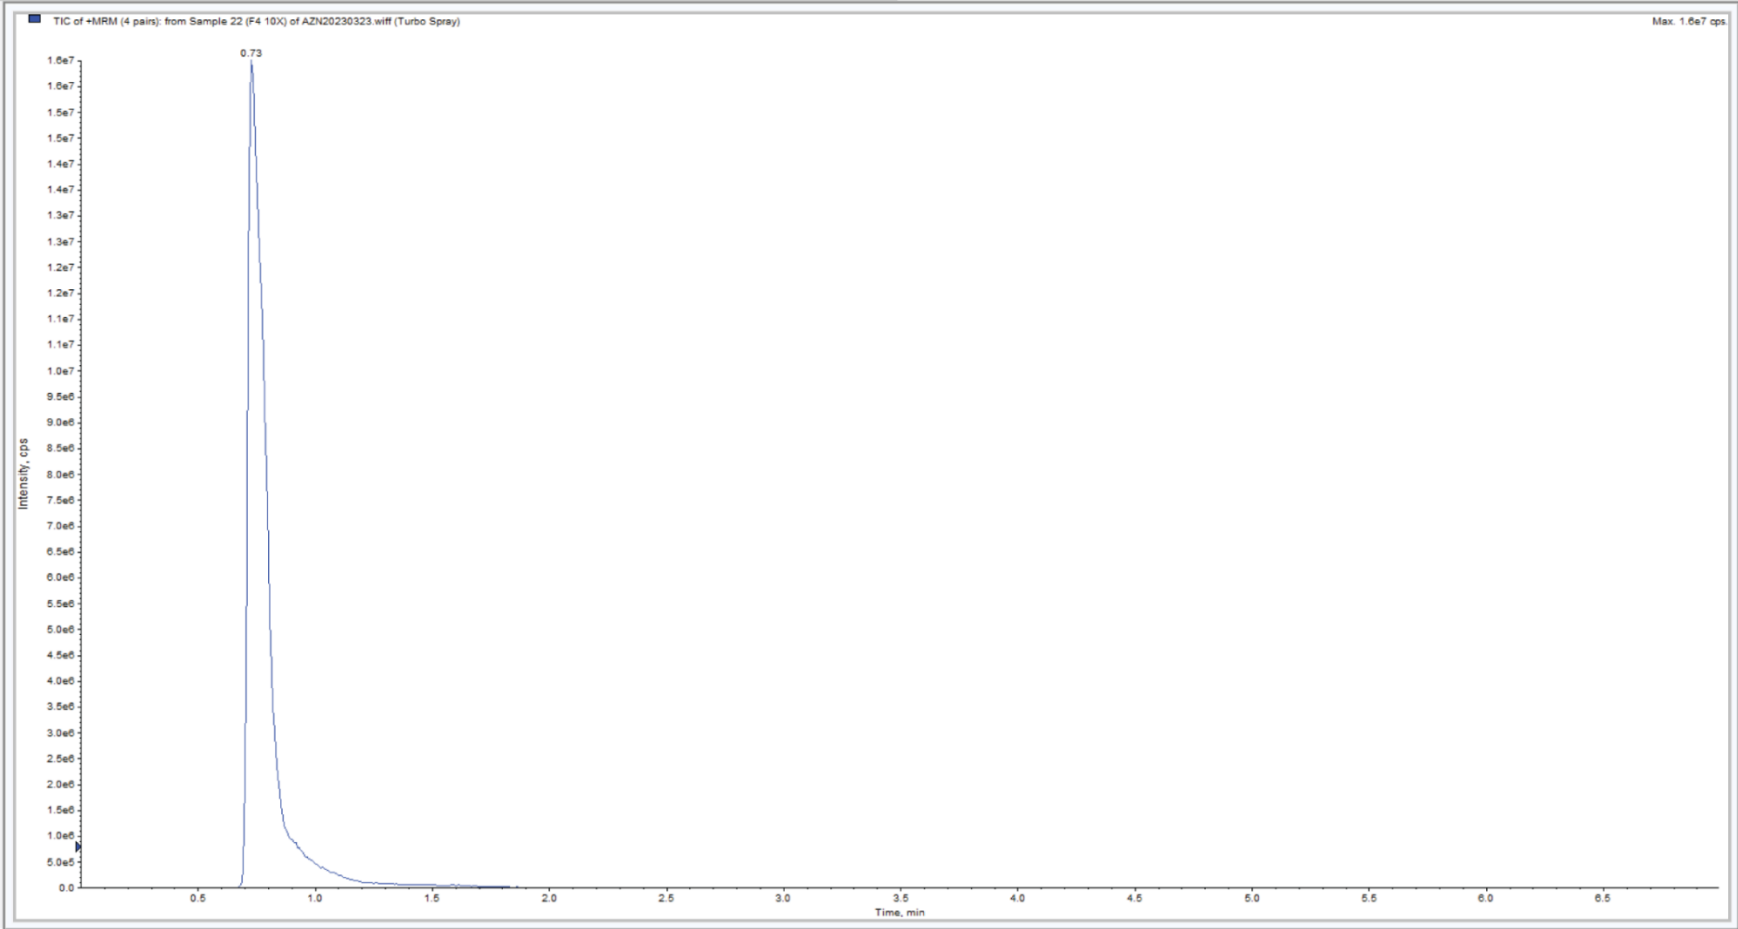

Supplement: ao3c03656_si_001.pdf [file ao3c03656_si_001.pdf]
